# Supplementary material for: Association Between Mobile Health Clinic Use, Care Coordination, and Continuity in Rural Areas: A Survey Study in Taiwan
Source: Research Square preprint supplement (doi:10.21203/rs.3.rs-7884507/v1), 2025-11-25
Supplement: Supplementary file 1 [file 503dff0cc75bdd3610143f36.docx]

Appendix 1. Characteristics of analytical sample in mountainous and non-mountainous townships, 2022

|  | **Total** |  | **Mountainous Townships** | |  | **Non-Mountainous Townships** | |  |  |
| --- | --- | --- | --- | --- | --- | --- | --- | --- | --- |
| **Characteristics** | **N=**  **1,995** |  | **No. in Sample (Unweighted) (n=996)** | **Weighted %** |  | **No. in Sample (Unweighted) (n=999)** | **Weighted %** |  | **p-value** |
| **Sex** |  |  |  |  |  |  |  |  |  |
| Female | 1,099 |  | 565 | 48.0 |  | 534 | 47.8 |  | 0.1542 |
| Male | 896 |  | 431 | 52.0 |  | 465 | 52.2 |  |  |
| **Age, years** |  |  |  |  |  |  |  |  |  |
| 20-64 | 1,159 |  | 589 | 83.5 |  | 570 | 76.0 |  | 0.3703 |
| 65+ | 836 |  | 407 | 16.5 |  | 429 | 24.0 |  |  |
| **Education** |  |  |  |  |  |  |  |  |  |
| Under grade12 | 890 |  | 440 | 26.0 |  | 450 | 29.0 |  | 0.7448 |
| GED/High school | 585 |  | 297 | 36.0 |  | 288 | 30.9 |  |  |
| College | 178 |  | 82 | 9.3 |  | 96 | 11.6 |  |  |
| Bachelor's degree | 289 |  | 151 | 25.9 |  | 138 | 24.7 |  |  |
| Graduate | 53 |  | 26 | 2.8 |  | 27 | 3.8 |  |  |
| **General health status** |  |  |  |  |  |  |  |  |  |
| Excellent | 407 |  | 238 | 27.9 |  | 170 | 21.4 |  | <0.001 |
| Good | 852 |  | 392 | 42.0 |  | 460 | 48.0 |  |  |
| Fair | 416 |  | 185 | 17.5 |  | 231 | 20.3 |  |  |
| Poor | 267 |  | 154 | 10.6 |  | 113 | 8.5 |  |  |
| Very poor | 53 |  | 28 | 2.0 |  | 25 | 1.8 |  |  |
| **Household income per month** |  |  |  |  |  |  |  |  |  |
| Under USD1,000 | 735 |  | 405 | 28.6 |  | 330 | 23.1 |  | 0.002 |
| USD1,000-USD1,667 | 421 |  | 214 | 24.2 |  | 207 | 21.3 |  |  |
| USD1,667-USD2,667 | 245 |  | 106 | 13.6 |  | 139 | 19.4 |  |  |
| USD2,667-USD3,333 | 126 |  | 51 | 7.3 |  | 75 | 9.5 |  |  |
| Over USD3,333 | 206 |  | 99 | 13.8 |  | 107 | 13.6 |  |  |
| Refused/Don’t know | 262 |  | 121 | 12.5 |  | 141 | 13.1 |  |  |
| **Marital status** |  |  |  |  |  |  |  |  |  |
| Married/partner | 1,252 |  | 593 | 54.2 |  | 659 | 58.3 |  | 0.007 |
| Unmarried | 724 |  | 395 | 45.2 |  | 329 | 40.9 |  |  |
| Refused/Don’t know |  |  | 8 | 0.6 |  | 11 | 0.8 |  |  |
| **With family physicians in living township** |  |  |  |  |  |  |  |  |  |
| Yes | 1,581 |  | 735 | 73.8 |  | 846 | 84.0 |  | <0.001 |
| No | 414 |  | 261 | 26.2 |  | 153 | 16.0 |  |  |
| **Having a usual physician** |  |  |  |  |  |  |  |  |  |
| Yes | 1,160 |  | 556 | 43.2 |  | 604 | 45.6 |  | 0.035 |
| No | 833 |  | 440 | 56.8 |  | 393 | 54.3 |  |  |
| Refused/Don’t know | 2 |  | 0 | - |  | 2 | 0.1 |  |  |
| **Mobile health clinic** |  |  |  |  |  |  |  |  |  |
| Used | 495 |  | 367 | 27.0 |  | 128 | 9.5 |  | <0.001 |
| No used | 1,500 |  | 629 | 73.0 |  | 871 | 90.5 |  |  |
| **Mobile health clinic physician as the usual physician** |  |  |  |  |  |  |  |  |  |
| Yes | 188 |  | 157 | 16.3 |  | 31 | 7.5 |  | <0.001 |
| No | 292 |  | 197 | 10.1 |  | 95 | 1.9 |  |  |
| No Used/Don’t know | 1515 |  | 642 | 73.5 |  | 873 | 90.6 |  |  |
