# Supplementary material for: Association Between Mobile Health Clinic Use, Care Coordination, and Continuity in Rural Areas: A Survey Study in Taiwan
Source: Research Square preprint supplement (doi:10.21203/rs.3.rs-7884507/v1), 2025-11-25
Supplement: Supplementary file 2 [file fbce2699eac76e77db7fe528.docx]

Appendix 2 - Questionnaire

Taiwan Residents’ Medical Needs and Accessibility Survey

| Dear Sir/Madam,  The Institute of Health Policy and Management at National Taiwan University is conducting a survey to better understand the healthcare needs of people in Taiwan. We sincerely invite you to participate in this study. Participants in this study must be 20 years of age or older. The survey will be conducted by telephone and will take approximately 15 minutes to complete. Your participation is completely voluntary — you may choose not to participate or stop answering at any time without providing a reason. There will be no discrimination, penalty, or loss of entitled benefits for declining or withdrawing from participation.  All personally identifiable information collected in this study will be kept strictly confidential in accordance with relevant regulations. In any future reports or publications, no personal data will be disclosed, and your identity will remain anonymous.  If you have any questions or concerns about this survey, please feel free to contact the Principal Investigators, Professor Shou-Hsia Cheng or Assistant Professor Ching-Ching Claire Lin, at the Institute of Health Policy and Management, National Taiwan University (Email: [ccclin@ntu.edu.tw](mailto:ccclin@ntu.edu.tw) ; Tel: +886-2-3366-8095). This study has been reviewed and approved by the National Taiwan University Research Ethics Committee. The review covered aspects such as risk–benefit assessment, participant protection, and privacy safeguards. If you have any concerns about your rights as a participant or experience any discomfort related to the study, you may also contact the NTU Research Ethics Center at +886-2-3366-9956 or +886-2-3366-9980.  Thank you once again for your time and assistance.  Sincerely,  Professor Shou-Hsia Cheng  Assistant Professor Ching-Ching Claire Lin  Institute of Health Policy and Management  National Taiwan University |
| --- |

**Section A. Personal Health Status**

A1. Overall, how would you rate your general health over the past year?

□(01) Excellent □(02) Good □(03)Fair □(04)Poor □(05) Very poor

□(98) Refuse to answer

A2. During the past year, how many times have you been hospitalized (excluding health checkups)?

□(01) Never hospitalized □(02) Yes, hospitalized, total of ___ times

□(03) Yes, hospitalized, but forgot how many times □(98) Refuse to answer

A3. During the past year, how many times have you visited the emergency department?

□(01) Never □(02) Yes, ___ times

□(03) Yes, but forgot how many times □(98) Refuse to answer

A4. In the past month, how many times have you visited a Western medicine outpatient clinic (excluding emergency visits, dental care, or preventive services)?

□(01) None □(02) Yes, ___ times

□(03) Yes, but forgot how many times  □(98) Refuse to answer

A5. Have you ever been diagnosed by a doctor with any of the following chronic conditions? (Select all that apply.)

| A chronic disease is defined as a long-lasting or persistent health condition or illness. |
| --- |

□(01) Hypertension (excluding pregnancy-related hypertension)

□(02) Heart disease

□(03) Kidney disease

□(04) Hyperlipidemia (high cholesterol or triglycerides)

□(05) Stroke

□(06) Liver disease

□(07) Diabetes (excluding pregnancy-related high blood sugar)

□(08) Gastric or duodenal ulcer

□(09) Lung disease (e.g., chronic bronchitis, emphysema, asthma, or chronic obstructive pulmonary disease)

□(10) Cancer

□(11) Other, please specify: ____________

□(12) None

□(95) Forgot

□(97) Don’t know

□(98) Refuse to answer

A6. How many types of chronic disease medications (including injections and oral medications, but excluding supplements or health products) do you currently take each day?

□(01) 1 □(02) 2 □(03) 3 □(04) 4 □(05) 5 or more

□(06) None □(95) Forgot □(97) Don’t know □(98) Refuse to answer

**Section B. Healthcare Accessibility**

B1. When you are ill and need to see a doctor, do you have a usual physician for medical visits?

□(01) Yes (continue to B1a) □(02) No (skip to B2) □(98) Refuse to answer

B1a. Which department does your usual physician primarily belong to? (Select all that apply.)

□(01) Geriatrics  □(02) Family medicine □(03) Cardiology □(04) Neurology

□(05) Metabolism/Endocrinology □(06) Oncology □(07) Orthopedics

□(08) Otolaryngology □(09) General internal medicine □(10) Gastroenterology

□(11) Other, please specify: ____________

B2. In the past year, have you ever needed medical care but did not get it?

□(01) Yes (continue to B2a) □(02) No (skip to B3) □(97) Don’t know

□(98) Refuse to answer

B2a. What were the main reasons you did not get medical care? (Select all that apply.)

□(01) The healthcare facility was too far away or transportation was inconvenient

□(02) No one could accompany me or take me to the clinic

□(03) Could not afford the cost

□(04) Too busy with work or household duties, had no time to go

□(05) Other, please specify: _______________________________

B3. Thinking about the nearest clinic or healthcare facility (excluding mobile clinics) near your home, approximately how long does it take you to get there (by walking or transportation)?

□(01) Within 10 minutes □(02) 10–30 minutes  □(03) 30–60 minutes

□(04) 1–2 hours □(05) More than 2 hours □(97) Not sure

□(98) Refuse to answer

B4. On average, how much do you usually spend for one outpatient visit (including registration fees, copayments, and self-pay items)?

□(01) NT$50 or less □(02) NT$51–100 □(03) NT$101–500

□(04) NT$501–1000 □(05) More than NT$1000 □(97) Don’t know

□(98) Refuse to answer

**Section C. Use of Mobile Health Clinics**

C1. Have you ever used any mobile health clinic services during the past year?

□(01) Yes (skip to C1b) □(02) No (continue to C1a)

| Mobile health clinics are services organized by the government to help residents in remote areas with limited access to hospitals or clinics receive medical care. Hospitals or public health centers regularly send physicians to these locations to provide services. These clinics usually operate at fixed sites, such as local clinics, health centers, or community activity centers, and may offer services such as Western medicine, traditional Chinese medicine, dental care, vaccinations, and preventive health services. |
| --- |

C1a. If you have never used mobile health clinic services, what are the reasons? (Select all that apply.)

□(01) The site is too far away

□(02) The schedule is inconvenient

□(03) The services or specialties I need are not available

□(04) I do not know the time or location of the mobile clinic

□(05) I have never heard of mobile health clinics

□(06) I feel I do not need to see a doctor

□(07) Other, please specify: ____________________________

**（After C1a., skip to C2.）**

C1b. Is the physician in the mobile health clinic your usual physician?

□(01) Yes □(02) No □(97) Not sure □(98) Refuse to answer

C1c. How many times have you visited a mobile health clinic in the past month? ___ times

C1d. What types of services have you received from mobile health clinics in the past year? (Select all that apply.)

□(01) Chronic disease management and follow-up visits

□(02) Acute illness care

□(03) Medication or health supplement consultation

□(04) Symptom consultation

□(05) Vaccination

□(06) Cancer screening

□(07) Other, please specify: ____________________________

C2. How long does it usually take you (by walking or transportation) to reach the mobile health clinic site?

□(01) Within 10 minutes □(02) 10–30 minutes  □(03) More than 30 minutes

□(97) Not sure

C3. If there were no mobile health clinic available, how long would it take you (by walking or transportation) to receive similar medical services at a regular hospital or clinic? (If multiple services apply, choose one.)

□(01) Within 10 minutes □(02) 10–30 minutes □(03) 30–60 minutes

□(04) 1–2 hours □(05) More than 2 hours □(97) Not sure

□(98) Refuse to answer

C4. Overall, do you think mobile health clinic services have been helpful to your health?

□(01) Very helpful  □(02) Helpful □(03) Neutral

□(04) Not helpful □(05) Not helpful at all

C5. In your opinion, what aspects of the mobile health clinic in your community could be improved? (Select all that apply.)

□(01) Location or facility conditions

□(02) Extend service hours

□(03) Assign fixed/regular physicians

□(04) Include additional medical specialties

□(05) Provide home visits or health education services

□(06) Increase the variety of available medications

□(07) Add medical testing and diagnostic equipment

□(08) Other, please specify: ____________________________

**Section D. Communication and Coordination Among Physicians**

D1. Does the physician that you visited frequently actively ask you about other physician visits you had elsewhere?

□(01) Yes □(02) Probably yes □(03) No □(97) Don’t know

□(98) Refuse to answer

D2. Does the physician that you visited frequently communicate with other physicians about your care?

□(01) Yes □(02) Probably yes □(03) No □(97) Don’t know

□(98) Refuse to answer

D3. Does the physician that you visited frequently discuss your medical conditions with other physicians?

□(01) Yes □(02) Probably yes □(03) No □(97) Don’t know

□(98) Refuse to answer

D4. Does the physician that you visited frequently provide conflicting medical advice compared to other physicians?

□(01) Yes □(02) Probably yes □(03) No □(97) Don’t know

□(98) Refuse to answer

D5. Have you undergone duplicate tests or examinations (such as blood, urine, or X-rays) for the same health issue at different medical facilities?

□(01) Yes □(02) Probably yes □(03) No □(97) Don’t know

□(98) Refuse to answer

D6. Does the physician that you visited works together with other physicians about your care?

□(01) Yes □(02) Probably yes □(03) No □(97) Don’t know

□(98) Refuse to answer

**Section E. Women’s Healthcare Needs**

**For the following questions, if you are female, please answer based on your own experience. If you are male, please answer based on the experience of a female family member in your household. If there is no female family member in your household, you may skip this section.**

E1. Do you (or your female family member) have an usual obstetrician/gynecologist?

□(01)No □(02)Yes □(97)Not sure

□(98) Refuse to answer

E2. Thinking about the nearest obstetrics/gynecology clinic or hospital with obstetrics/gynecology services near your home, approximately how long does it take to reach this clinic or hospital by transportation?

□(01) Within 10 minutes □(02) 10–30 minutes □(03) 30–60 minutes

□(04) 1–2 hours □(05) More than 2 hours □(97) Not sure

E3. In the past year, have you (or your female family member) given birth?

□(01) No (skip to F1) □(02) Yes (continue to E4)  □(98) Refuse to answer

E4. For the most recent delivery, which type of physician assisted the birth?

□(01) Obstetrician/Gynecologist □(02) Family medicine physician

□(03) General surgeon □(04) Other, please specify: _______________

E5. For this delivery, approximately how long did it take to reach the hospital or clinic by transportation?

□(01) Within 10 minutes □(02) 10–30 minutes □(03) 30–60 minutes

□(04) 1–2 hours □(05) More than 2 hours □(97) Not sure

**Section F. Respondent Background Information**

F1. What is your gender?

□(01) Male □(02) Female □(03) Other □(04) Prefer not to disclose

F2. What is your date of birth? Year: ______  Month: ______

F3. In which city/county do you live?

__________ (City/County) __________ (Township/District)

F4. In which city/county do you work?

__________ (City/County) __________ (Township/District)

F5. What is your highest level of education (including incomplete schooling)?

□(01) Illiterate □(02) Literate but never attended school □(03) Elementary school

□(04) Junior high school  □(05) GED/High school □(06) College

□(07) Bachelor's degree □(08) Graduate

□(09) Other, please specify: _____________ □(97) Not sure □(98) Refuse to answer

F6. Including yourself, how many people live in your household?

□(01) 1 person (live alone) □(02) 2 people □(03) 3–4 people

□(04) 5 or more people

F7. What is your total monthly household income (approximately)?

□(01) NT$30,000 or less  □(02) NT$30,001–50,000

□(03) NT$50,001–80,000 □(04) NT$80,001–100,000

□(05) NT$100,001 or more

□(97) Not sure □(98) Refuse to answer

F8. What is your current marital status?

□01) Never married □(02) Married and living together

□(03) Married but formally separated

□(04) Divorced □(05) Widowed and not remarried  □(06) Other

F9. Which ethnic background best describes your father?

□(01) Taiwanese Hakka

□(02) Taiwanese Minnan (Hoklo)

□(03) Mainland Chinese (from other provinces of China)

□(04) Taiwanese Indigenous peoples

□(05) Other, please specify: ______________

□(97) Don’t know □(98) Refuse to answer

**＊End of the questionnaire. Thank you very much for your participation.＊**
